# Supplementary material for: Effect of Ezetimibe on Hepatic Fat, Inflammatory Markers, and Apolipoprotein B-100 Kinetics in Insulin-Resistant Obese Subjects on a Weight Loss Diet
Source: PubMed Central journal article supplement — Diabetes Care. 2010 Feb 15;33(5):1134–9. doi: 10.2337/dc09-1765 (PMC2858190; doi:10.2337/dc09-1765), 2010-02-15
Supplement: supp_dc09-1765_onlineappendix.pdf [file supp_dc09-1765_onlineappendix.pdf]

## Online Appendix Table A

Changes in plasma alanine transferase concentration and intrahepatic triglyceride content before and after intervention

| Subjects | Alanine transferase (U/L) |       |             | Intrahepatic triglyceride content (%) |       |             |       |
|----------|---------------------------|-------|-------------|---------------------------------------|-------|-------------|-------|
|          | Wk0                       | Wk 22 | Differences | Wk0                                   | Wk 22 | Differences |       |
| WL       | 1                         | 40    | 25          | -15                                   | 29    | 16          | -13   |
|          | 2                         | 16    | 18          | 2                                     | 6.2   | 4.7         | -1.5  |
|          | 3                         | 16    | 15          | -1                                    | 30    | 18          | -12   |
|          | 4                         | 14    | 15          | 1                                     | 1.6   | 1.1         | -0.5  |
|          | 5                         | 65    | 30          | -35                                   | 33    | 27          | -6    |
|          | 6                         | 35    | 35          | 0                                     | 32    | 17          | -15   |
|          | 7                         | 34    | 32          | -2                                    | 47    | 42.6        | -4.4  |
|          | 8                         | 50    | 50          | 0                                     | 16    | 10.2        | -5.8  |
|          | 9                         | 16    | 15          | -1                                    | 7     | 4.6         | -2.4  |
|          | 10                        | 29    | 27          | -2                                    | 17.5  | 16          | -1.5  |
| EZWL     | 1                         | 31    | 60          | 29                                    | 39    | 24          | -15   |
|          | 2                         | 30    | 44          | 14                                    | 12    | 8.2         | -3.8  |
|          | 3                         | 28    | 30          | 2                                     | 32    | 12          | -20   |
|          | 4                         | 30    | 23          | -7                                    | 3.4   | 2.1         | -1.3  |
|          | 5                         | 29    | 29          | 0                                     | 16    | 10          | -6    |
|          | 6                         | 36    | 34          | -2                                    | 26    | 15          | -11   |
|          | 7                         | 25    | 30          | 5                                     | 24    | 11.7        | -12.3 |
|          | 8                         | 44    | 31          | -13                                   | 41    | 21          | -20   |
|          | 9                         | 36    | 30          | -6                                    | 18    | 10          | -8    |
|          | 10                        | 18    | 23          | 5                                     | 8.2   | 7.2         | -1    |
|          | 11                        | 29    | 32          | 3                                     | 3.5   | 2           | -1.5  |
|          | 12                        | 24    | 17          | -7                                    | 19    | 5.1         | -13.9 |
|          | 13                        | 17    | 19          | 2                                     | 4.2   | 3.1         | -1.1  |
|          | 14                        | 21    | 30          | 9                                     | 14    | 8.6         | -5.4  |
|          | 15                        | 32    | 17          | -15                                   | 14.6  | 8.8         | -5.8  |

WL: Weight loss                      EZWL: Ezetimibe plus Weight loss
